# Supplementary material
Source: publisher figshare collection journal article supplement (https://karger.figshare.com/ndownloader/files/35096158)
Supplement: Supplementary file 1 [file 35096158]

**Supplemental Table S2.** *Eligibility criteria*

| **Inclusion criteria** | **Exclusion criteria** |
| --- | --- |
| - Published after 01-01-2013  - Study participants aged >18 years old  - Human subjects  - Original studies | - Meta-analysis  - Review  - Case-report  - Expert opinion  - Authors’ reply  - Conference abstracts  - Language other than English  - No relevant data report |
